# Supplementary material for: Pubertal and adult windows of susceptibility to a high animal fat diet in Trp53-null mammary tumorigenesis
Source: PubMed Central journal article supplement (PMC5347778; doi:10.18632/oncotarget.13112), 2016-11-04
Supplement: oncotarget-07-83409-s001.pdf [file oncotarget-07-83409-s001.pdf]

## Pubertal and adult windows of susceptibility to a high animal fat diet in *Trp53*-null mammary tumorigenesis

### SUPPLEMENTARY FIGURES AND TABLES

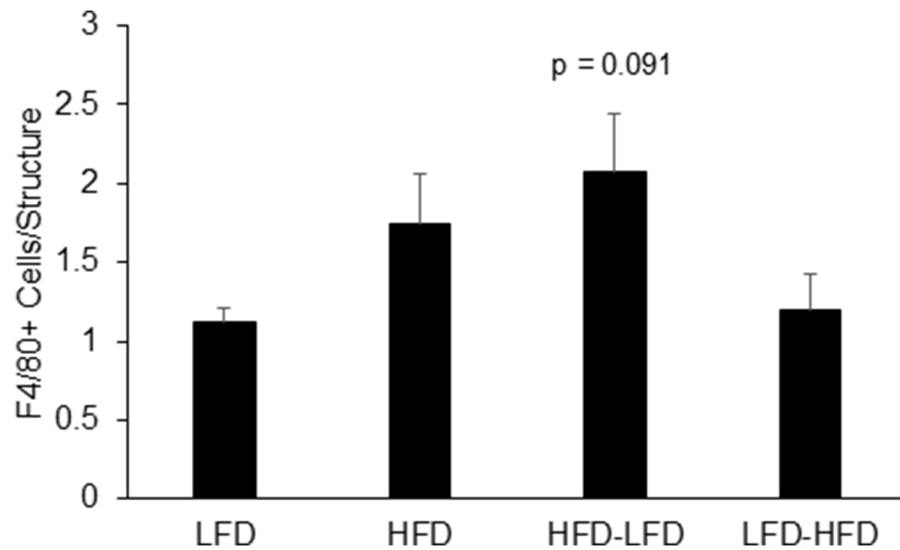

**Supplementary Figure S1: Recruitment of macrophages to normal mammary glands of 19-week old mice across dietary regimens.** The increase in macrophages in the normal mammary glands of HFD-LFD mice compared to LFD mice approached significance. LFD (n=8); HFD (n=4); HFD-LFD (n=4); LHF-HFD (n=4).

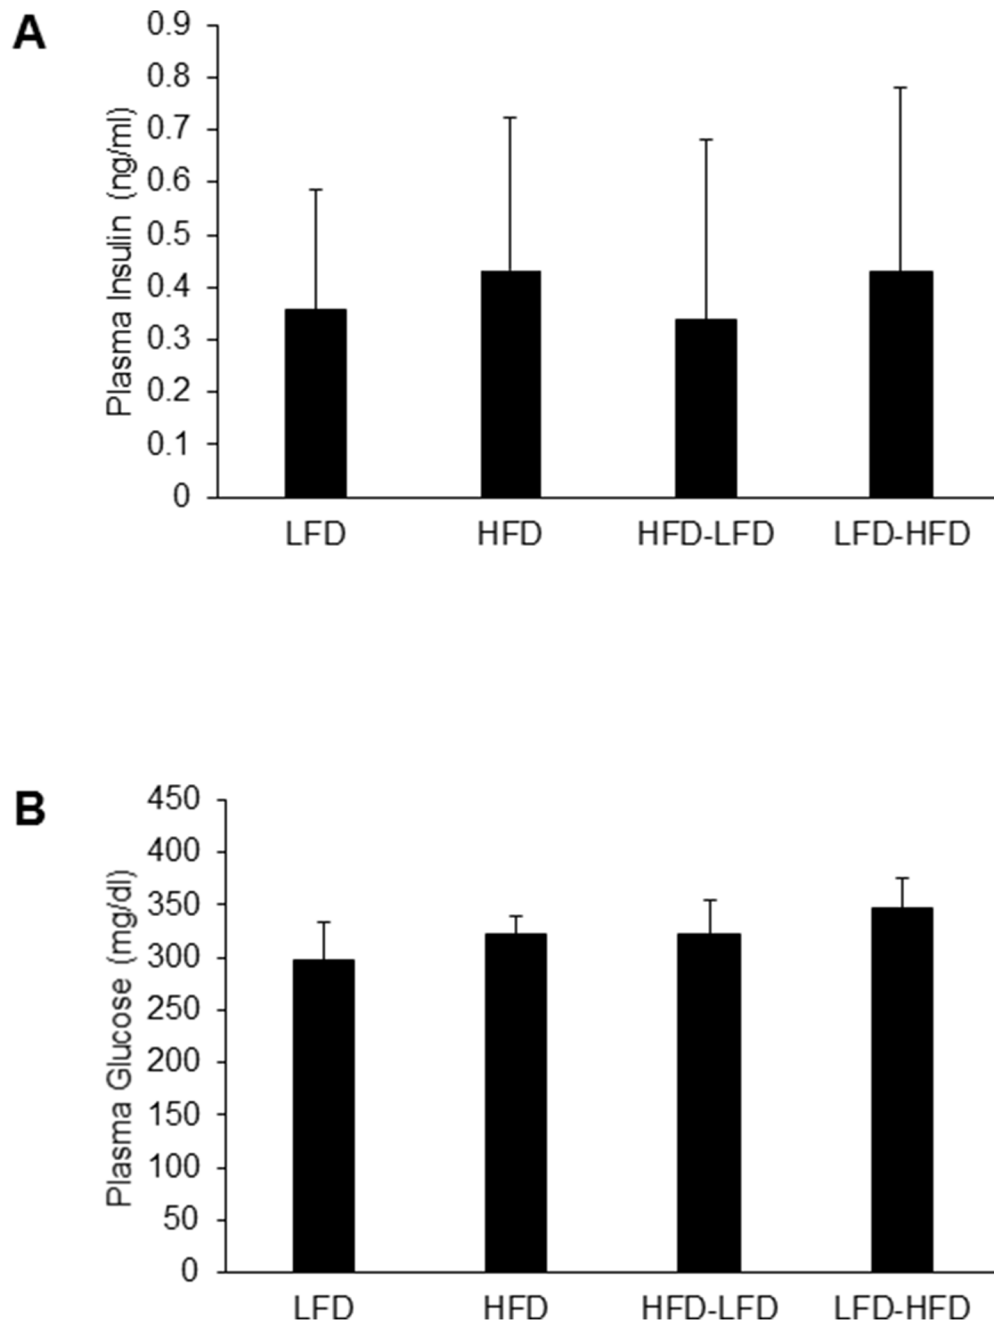

**Supplementary Figure S2: Effects of dietary regimens on plasma insulin and glucose levels in 19-week old mice.** No significant differences were observed among the dietary regimens. LFD (n=7); HFD (n=8); HFD-LFD (n=7); LHF-HFD (n=8).

**Supplementary Table S1: Proportion of ER+/PR+ tumors by diet treatment and histopathology**

| <b>Diet</b> | <b>Tumor Type</b> | <b>ER+PR+/Total</b> |
|-------------|-------------------|---------------------|
| LFD         | Epithelial        | 3/12                |
|             | Spindle Cell      | 0/5                 |
| HFD         | Epithelial        | 8/26                |
|             | Spindle Cell      | 0/8                 |
| LFD-HFD     | Epithelial        | 5/19                |
|             | Spindle Cell      | 0/12                |
| HFD-LFD     | Epithelial        | 5/21                |
|             | Spindle Cell      | 0/8                 |

**Supplementary Table S2: ANOVA of the effects measured versus diet, early and late onset epithelial tumors plus spindle cell tumors, and the interaction of diet with onset and/or spindle cell properties**

| Effect     | Tumor Types   | Diet | Onset/Spindle | Interaction |
|------------|---------------|------|---------------|-------------|
| PCNA       | Epi + Spindle | 0.00 | 0.86          | 0.17        |
|            | Epi           | 0.01 | 0.89          | 0.01        |
| TUNEL      | Epi + Spindle | 0.03 | 0.39          | 0.23        |
|            | Epi           | 0.15 | 0.89          | 0.09        |
| CD31       | Epi + Spindle | 0.00 | 0.03          | 0.89        |
|            | Epi           | 0.02 | 0.42          | 0.72        |
| F4/80      | Epi + Spindle | 0.03 | 0.35          | 0.66        |
|            | Epi           | 0.01 | 0.48          | 0.09        |
| F4/80+Arg1 | Epi + Spindle | 0.00 | 0.20          | 0.83        |
|            | Epi           | 0.00 | 0.50          | 0.3         |

ANOVA was performed on data derived from epithelial and spindle cell tumors (Epi + Spindle) or epithelial tumors alone (Epi).

**Supplementary Table S3: Gene ontology analysis comparing early tumors to late tumors**

See Supplementary File 1

**Supplementary Table S4: Mammary gland transplantation and occurrence of mammary tumors**

|                                 | <b>LFD</b> | <b>HFD</b> | <b>LFD-HFD</b> | <b>HFD-LFD</b> |
|---------------------------------|------------|------------|----------------|----------------|
| <b>Mice</b>                     | 33         | 31         | 31             | 31             |
| <b>Successful Transplants</b>   | 37         | 46         | 39             | 42             |
| <b>Unsuccessful Transplants</b> | 26         | 14         | 20             | 16             |
| <b>Dead</b>                     | 3          | 2          | 3              | 4              |
| <b>Mammary Tumors</b>           | 17         | 30         | 27             | 26             |
| <b>Early Tumors</b>             | 6          | 13         | 14             | 16             |
| <b>Late Tumors</b>              | 11         | 17         | 13             | 12             |

For each diet group, the number of mice, successful mammary gland transplants, unsuccessful mammary gland transplants, glands unevaluated because of death, mammary tumors, early tumors (<52 weeks), and late tumors ( $\geq$ 52 weeks) are enumerated.

Supplementary Table S5: Diet composition

| Ingredients (g/100 g) |                                       | Low Fat Diet | High Fat Diet |
|-----------------------|---------------------------------------|--------------|---------------|
| Fat                   | Corn Oil                              | 2.369        | 16.1498       |
|                       | Lard                                  | 1.8957       | 31.6537       |
| Carbohydrate          | Corn Starch                           | 54.407       | 8.888         |
|                       | Maltodextrin                          | 11.848       | 16.1498       |
| Protein               | Casein                                | 18.987       | 25.8397       |
|                       | L-cystine                             | 0.2843       | 0.3876        |
| Fiber                 | Cellulose                             | 4.7393       | 6.4599        |
| Vitamins              | Vitamin Mix V10001                    | 0.9479       | 1.2919        |
|                       | Choline Bitartrate                    | 0.1896       | 0.2584        |
| Minerals              | Mineral Mix S10026                    | 0.9479       | 0.1286        |
|                       | DiCalcium Phosphate                   | 1.2322       | 1.6795        |
|                       | Calcium Carbonate                     | 0.5213       | 0.7106        |
|                       | Potassium Citrate, 1 H <sub>2</sub> O | 1.5639       | 2.1318        |
| <b>Energy</b>         |                                       |              |               |
| kcal density/g        |                                       | 3.8          | 5.2           |
| % kcal                | Fat                                   | 10           | 60            |
|                       | Carbohydrate                          | 70           | 20            |
|                       | Protein                               | 20           | 20            |

Supplementary Table S6: BALB/c *Trp53*<sup>-/-</sup> tumors used for microarray analysis

| Epithelial tumors   |        |                 |
|---------------------|--------|-----------------|
| Diet                | Tumor# | Latency (weeks) |
| LFD-Early           | 31R    | 36              |
|                     | 22R    | 38              |
|                     | 17R    | 41              |
|                     | 11R    | 47              |
| LFD-Late            | 13L    | 53              |
|                     | 19R    | 54              |
|                     | 27L4A  | 56              |
|                     | 11L    | 58              |
| HFD-Early           | 42L4B  | 39              |
|                     | 60L    | 41              |
|                     | 65R    | 41              |
|                     | 40R4A  | 44              |
| HFD-Late            | 57R    | 52              |
|                     | 66L    | 55              |
|                     | 56R    | 55              |
|                     | 62L    | 59              |
| LFD-HFD-Early       | 80L    | 35              |
|                     | 92R    | 36              |
|                     | 78R    | 42              |
|                     | 82L    | 42              |
| LFD-HFD-Late        | 71L    | 52              |
|                     | 101R   | 57              |
|                     | 101L4A | 57              |
|                     | 90R    | 60              |
| HFD-LFD-Early       | 117L   | 35              |
|                     | 115R   | 37              |
|                     | 117R   | 40              |
|                     | 107L   | 43              |
| HFD-LFD-Late        | 108R   | 56              |
|                     | 109L   | 57              |
|                     | 110R   | 60              |
|                     | 122R   | 60              |
| Spindle Cell Tumors |        |                 |
| LFD                 | 33R    | 52              |
|                     | 18L    | 52              |
|                     | 32L    | 55              |
| HFD                 | 63L    | 36              |
|                     | 54R    | 52              |
|                     | 56LA   | 58              |
| LFD-HFD             | 84R    | 39              |
|                     | 86R    | 46              |
|                     | 76R    | 60              |
| HFD-LFD             | 128L   | 35              |
|                     | 129L   | 41              |
|                     | 118RA  | 52              |
